# Supplementary material for: Preparation and characterization of a homogeneous immunoassay for point-of-care testing (POCT) of procalcitonin (PCT)
Source: Royal Society of Chemistry journal article supplement (doi:10.1039/d3ay00890h), 2023-01-01
Supplement: d3ay00890h1.pdf [file d3ay00890h1.pdf]

## Preparation and characterization of a homogenous immunoassay for point-of-care testing (POCT) of procalcitonin (PCT)

Zhaoying Li<sup>†a,b</sup>, Weixiang Zhai<sup>†c</sup>, Lu Wang<sup>a,d</sup>, Jiyang Liu<sup>e</sup>, Chunjie Li<sup>†b</sup> and Liang Xu<sup>\*a,c,d</sup>

<sup>a</sup> Graduate School, Tianjin Medical University, Tianjin, 300070, China.

<sup>b</sup> Tianjin Chest Hospital, Tianjin, 300222, China

<sup>c</sup> Tianjin Medical College, Tianjin, 300222, China

<sup>d</sup> School of Pharmacy, Tianjin Medical University, No.22 Qixiangtai Road, Heping District, Tianjin, 300070, China

<sup>e</sup> Epsilon Biotechnology Corporation, Zhejiang, 311199, China

<sup>†</sup> These authors contributed equally to this work.

\*Corresponding author: [xuliang@tmu.edu.cn](mailto:xuliang@tmu.edu.cn)

### SUPPLEMENTARY MATERIAL

#### Figures

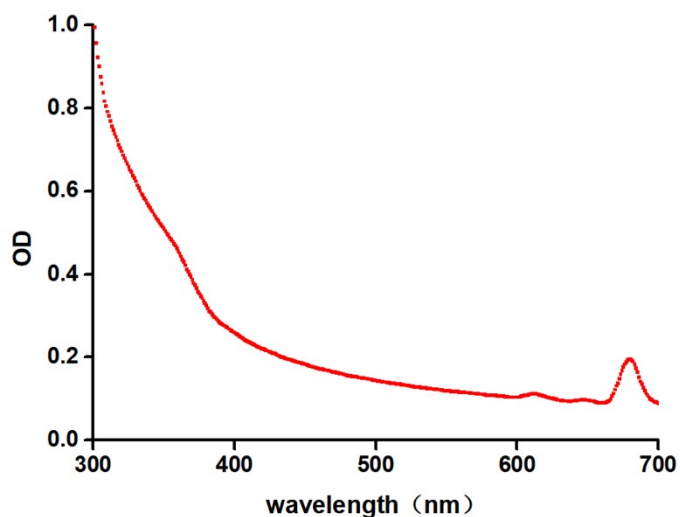

Fig. S1 Full wavelength scanning spectrum of donor bead.

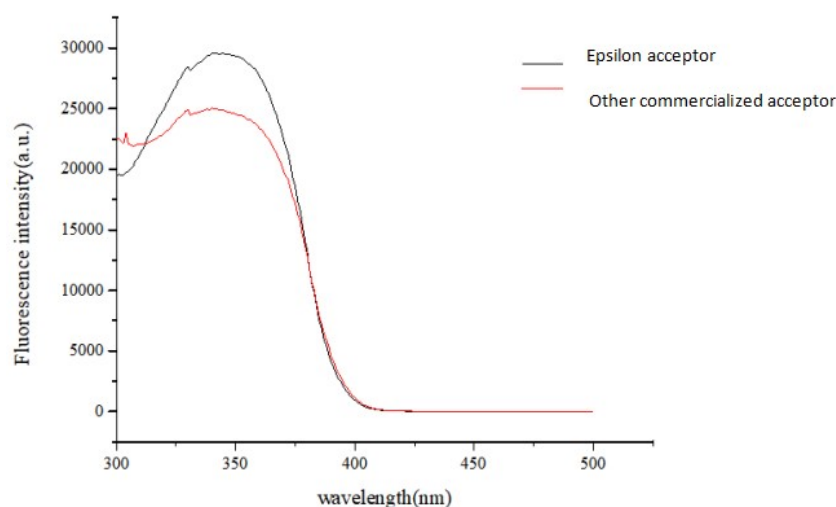

Fig. S2 Excitation spectra of acceptors.

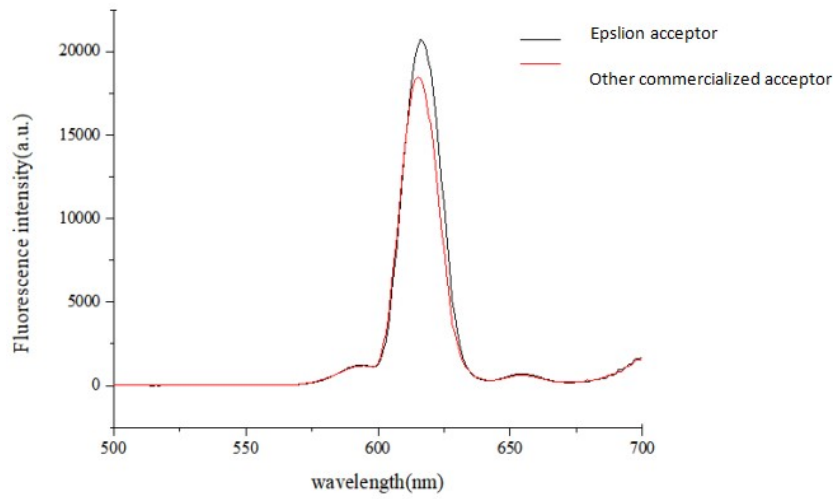

Fig. S3 Emission spectrums of acceptors.

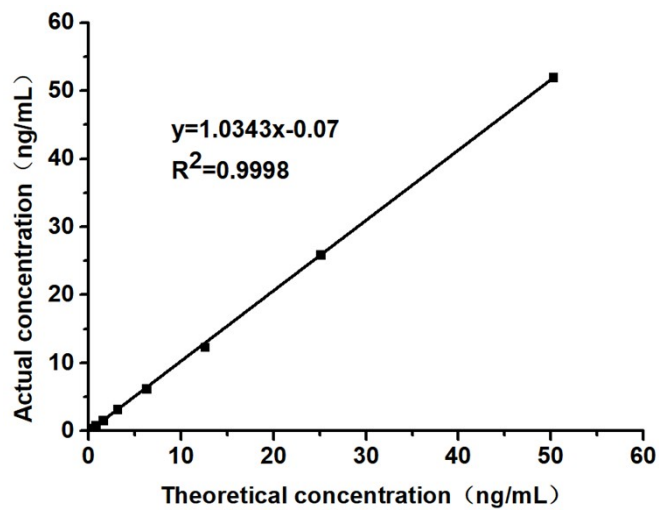

Fig. S4 Correlation analysis between theoretical concentration of PCT in serum samples and actual concentration of PCT in serum samples measured by SMILE method.

## Table

**Table. S1** Recovery of PCT serum samples with different dilution (n=13)

| <b>Theoretical concentration<br/>(ng/mL)</b> | <b>Actual concentration<br/>(ng/mL)</b> | <b>Recovery<br/>(%)</b> |
|----------------------------------------------|-----------------------------------------|-------------------------|
| 50.20                                        | 52.00                                   | 103.59                  |
| 25.10                                        | 25.90                                   | 103.19                  |
| 12.55                                        | 12.37                                   | 98.57                   |
| 6.28                                         | 6.25                                    | 99.60                   |
| 3.14                                         | 3.22                                    | 102.63                  |
| 1.57                                         | 1.60                                    | 101.99                  |
| 0.78                                         | 0.82                                    | 104.54                  |
| 0.39                                         | 0.39                                    | 98.42                   |
| 0.20                                         | 0.21                                    | 107.09                  |
| 0.10                                         | 0.10                                    | 101.99                  |
| 0.049                                        | 0.049                                   | 99.95                   |
| 0.025                                        | 0.023                                   | 93.83                   |
| 0.012                                        | 0.011                                   | 89.75                   |
